# Supplementary figures and images for: NAB2-STAT6 drives an EGR1-dependent neuroendocrine program in solitary fibrous tumors
Source: eLife journal article supplement (doi:10.7554/elife.98072), 2024-09-05

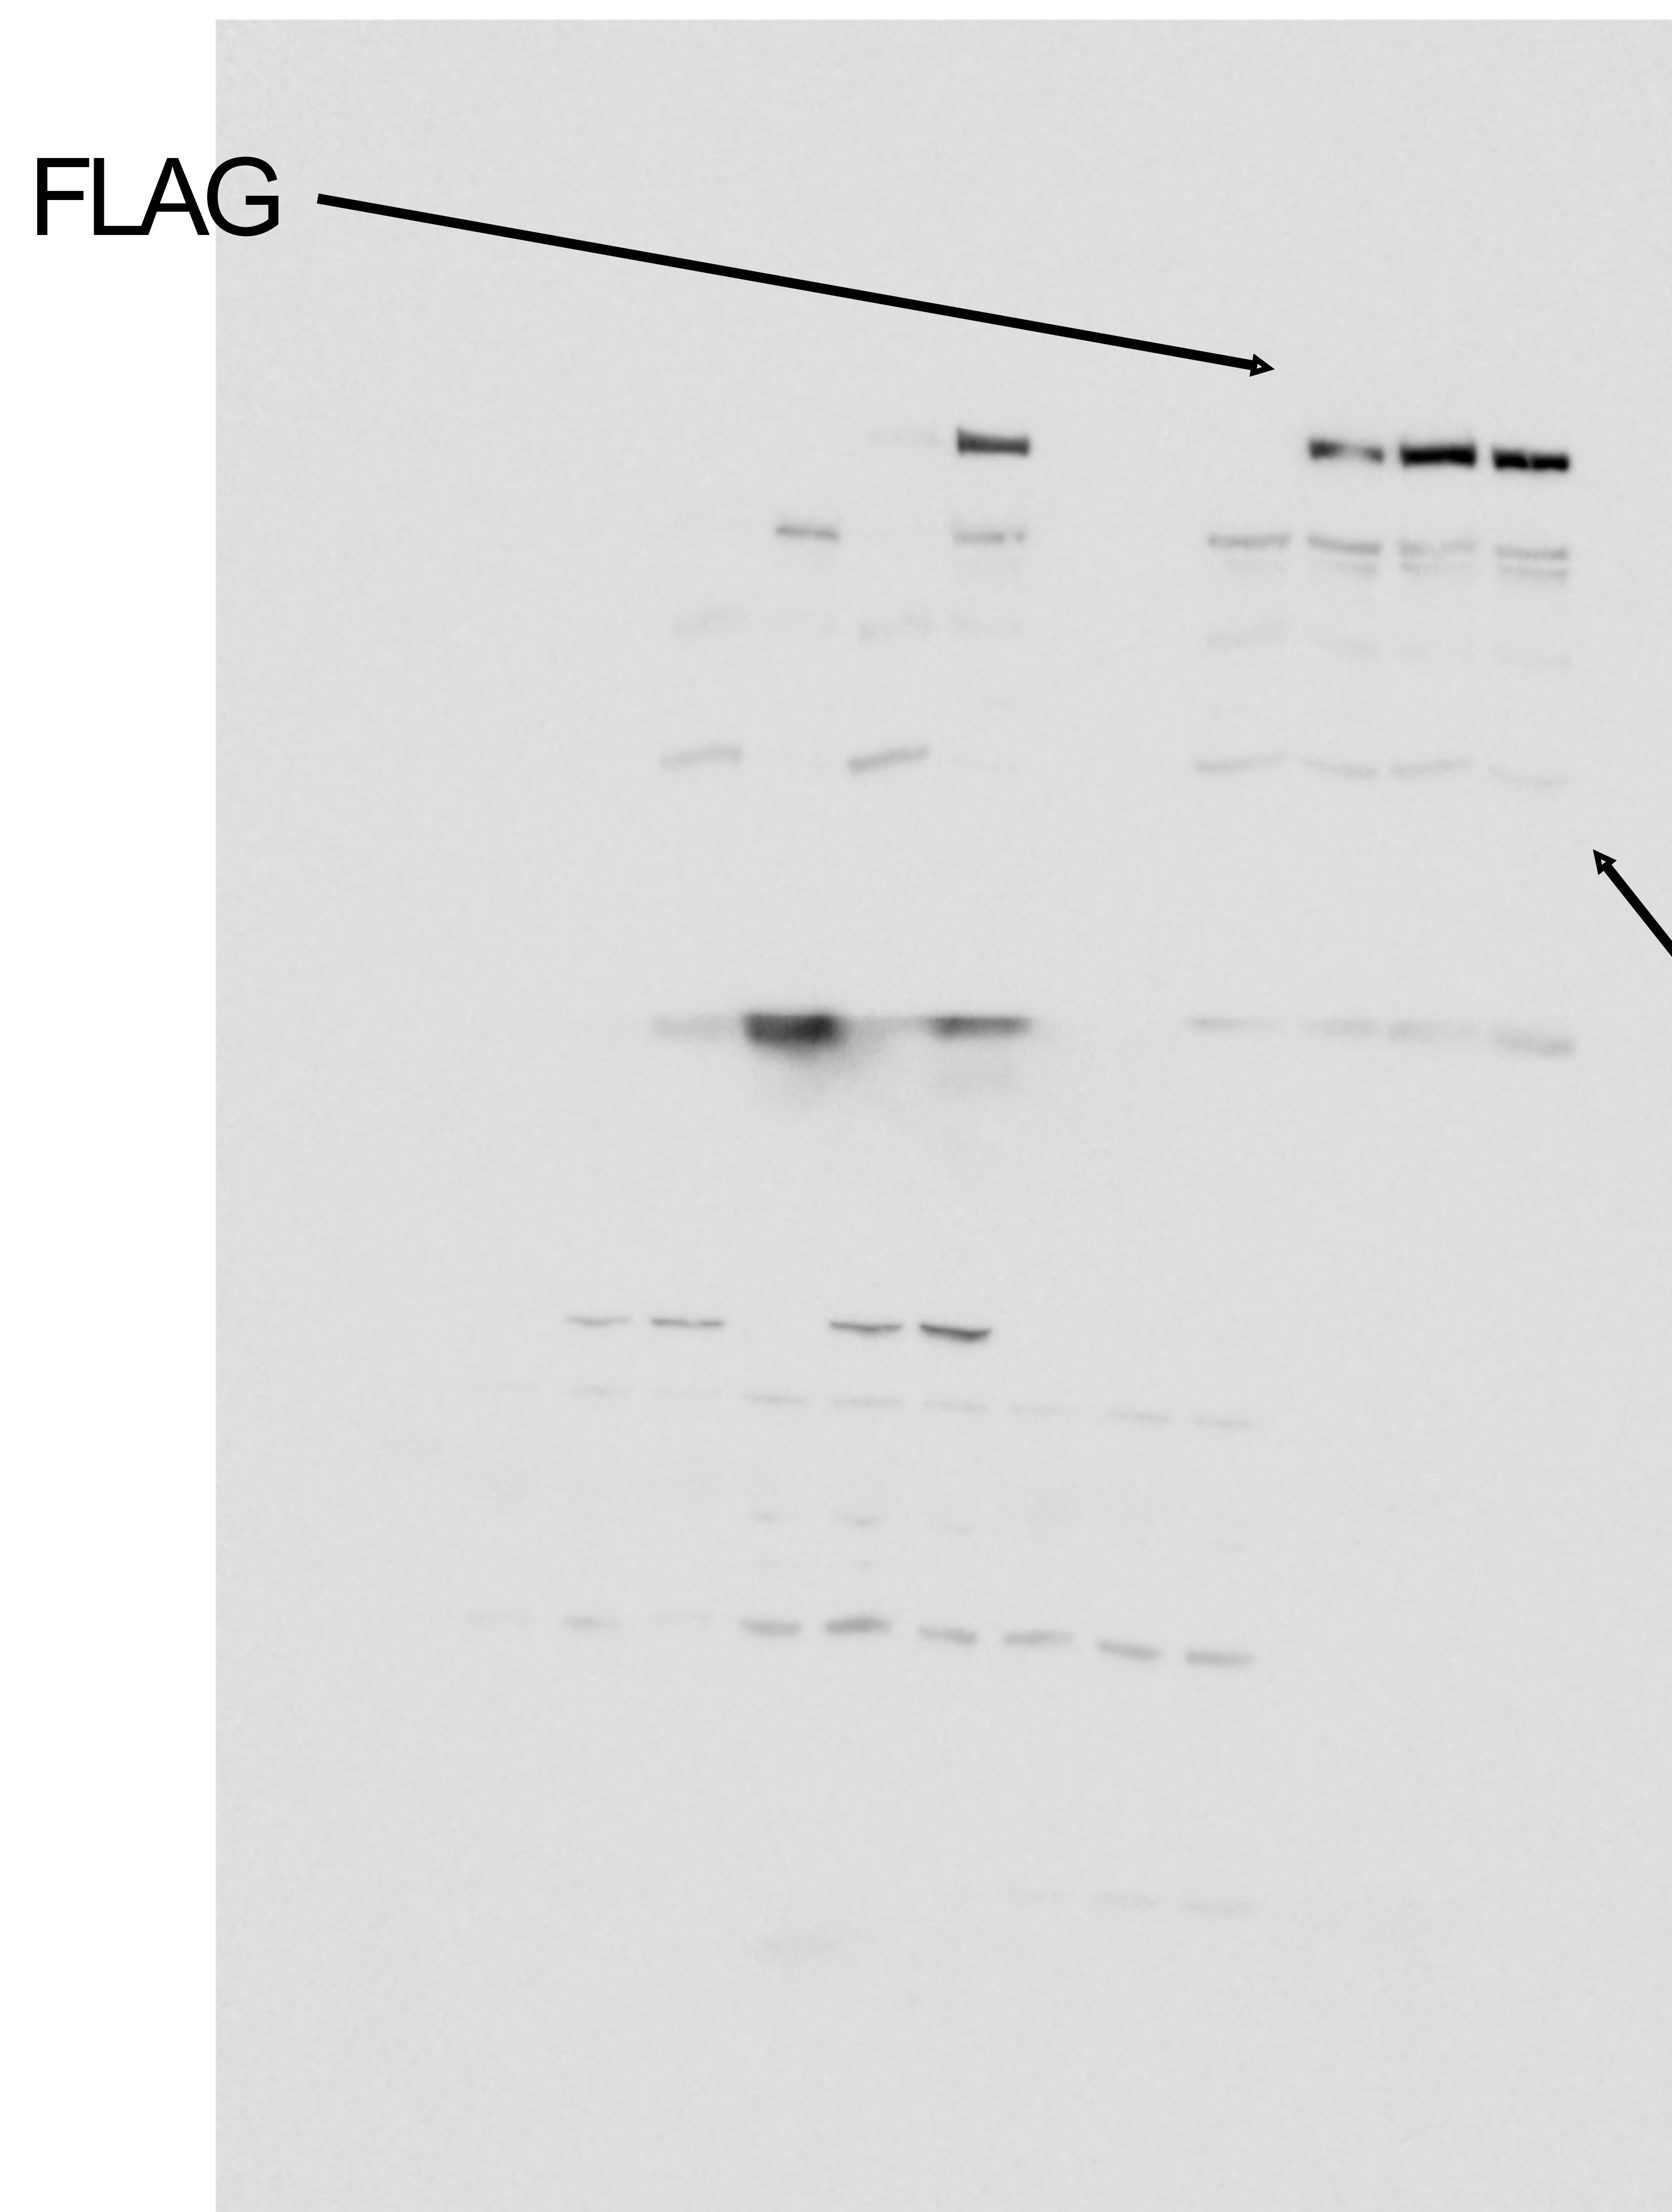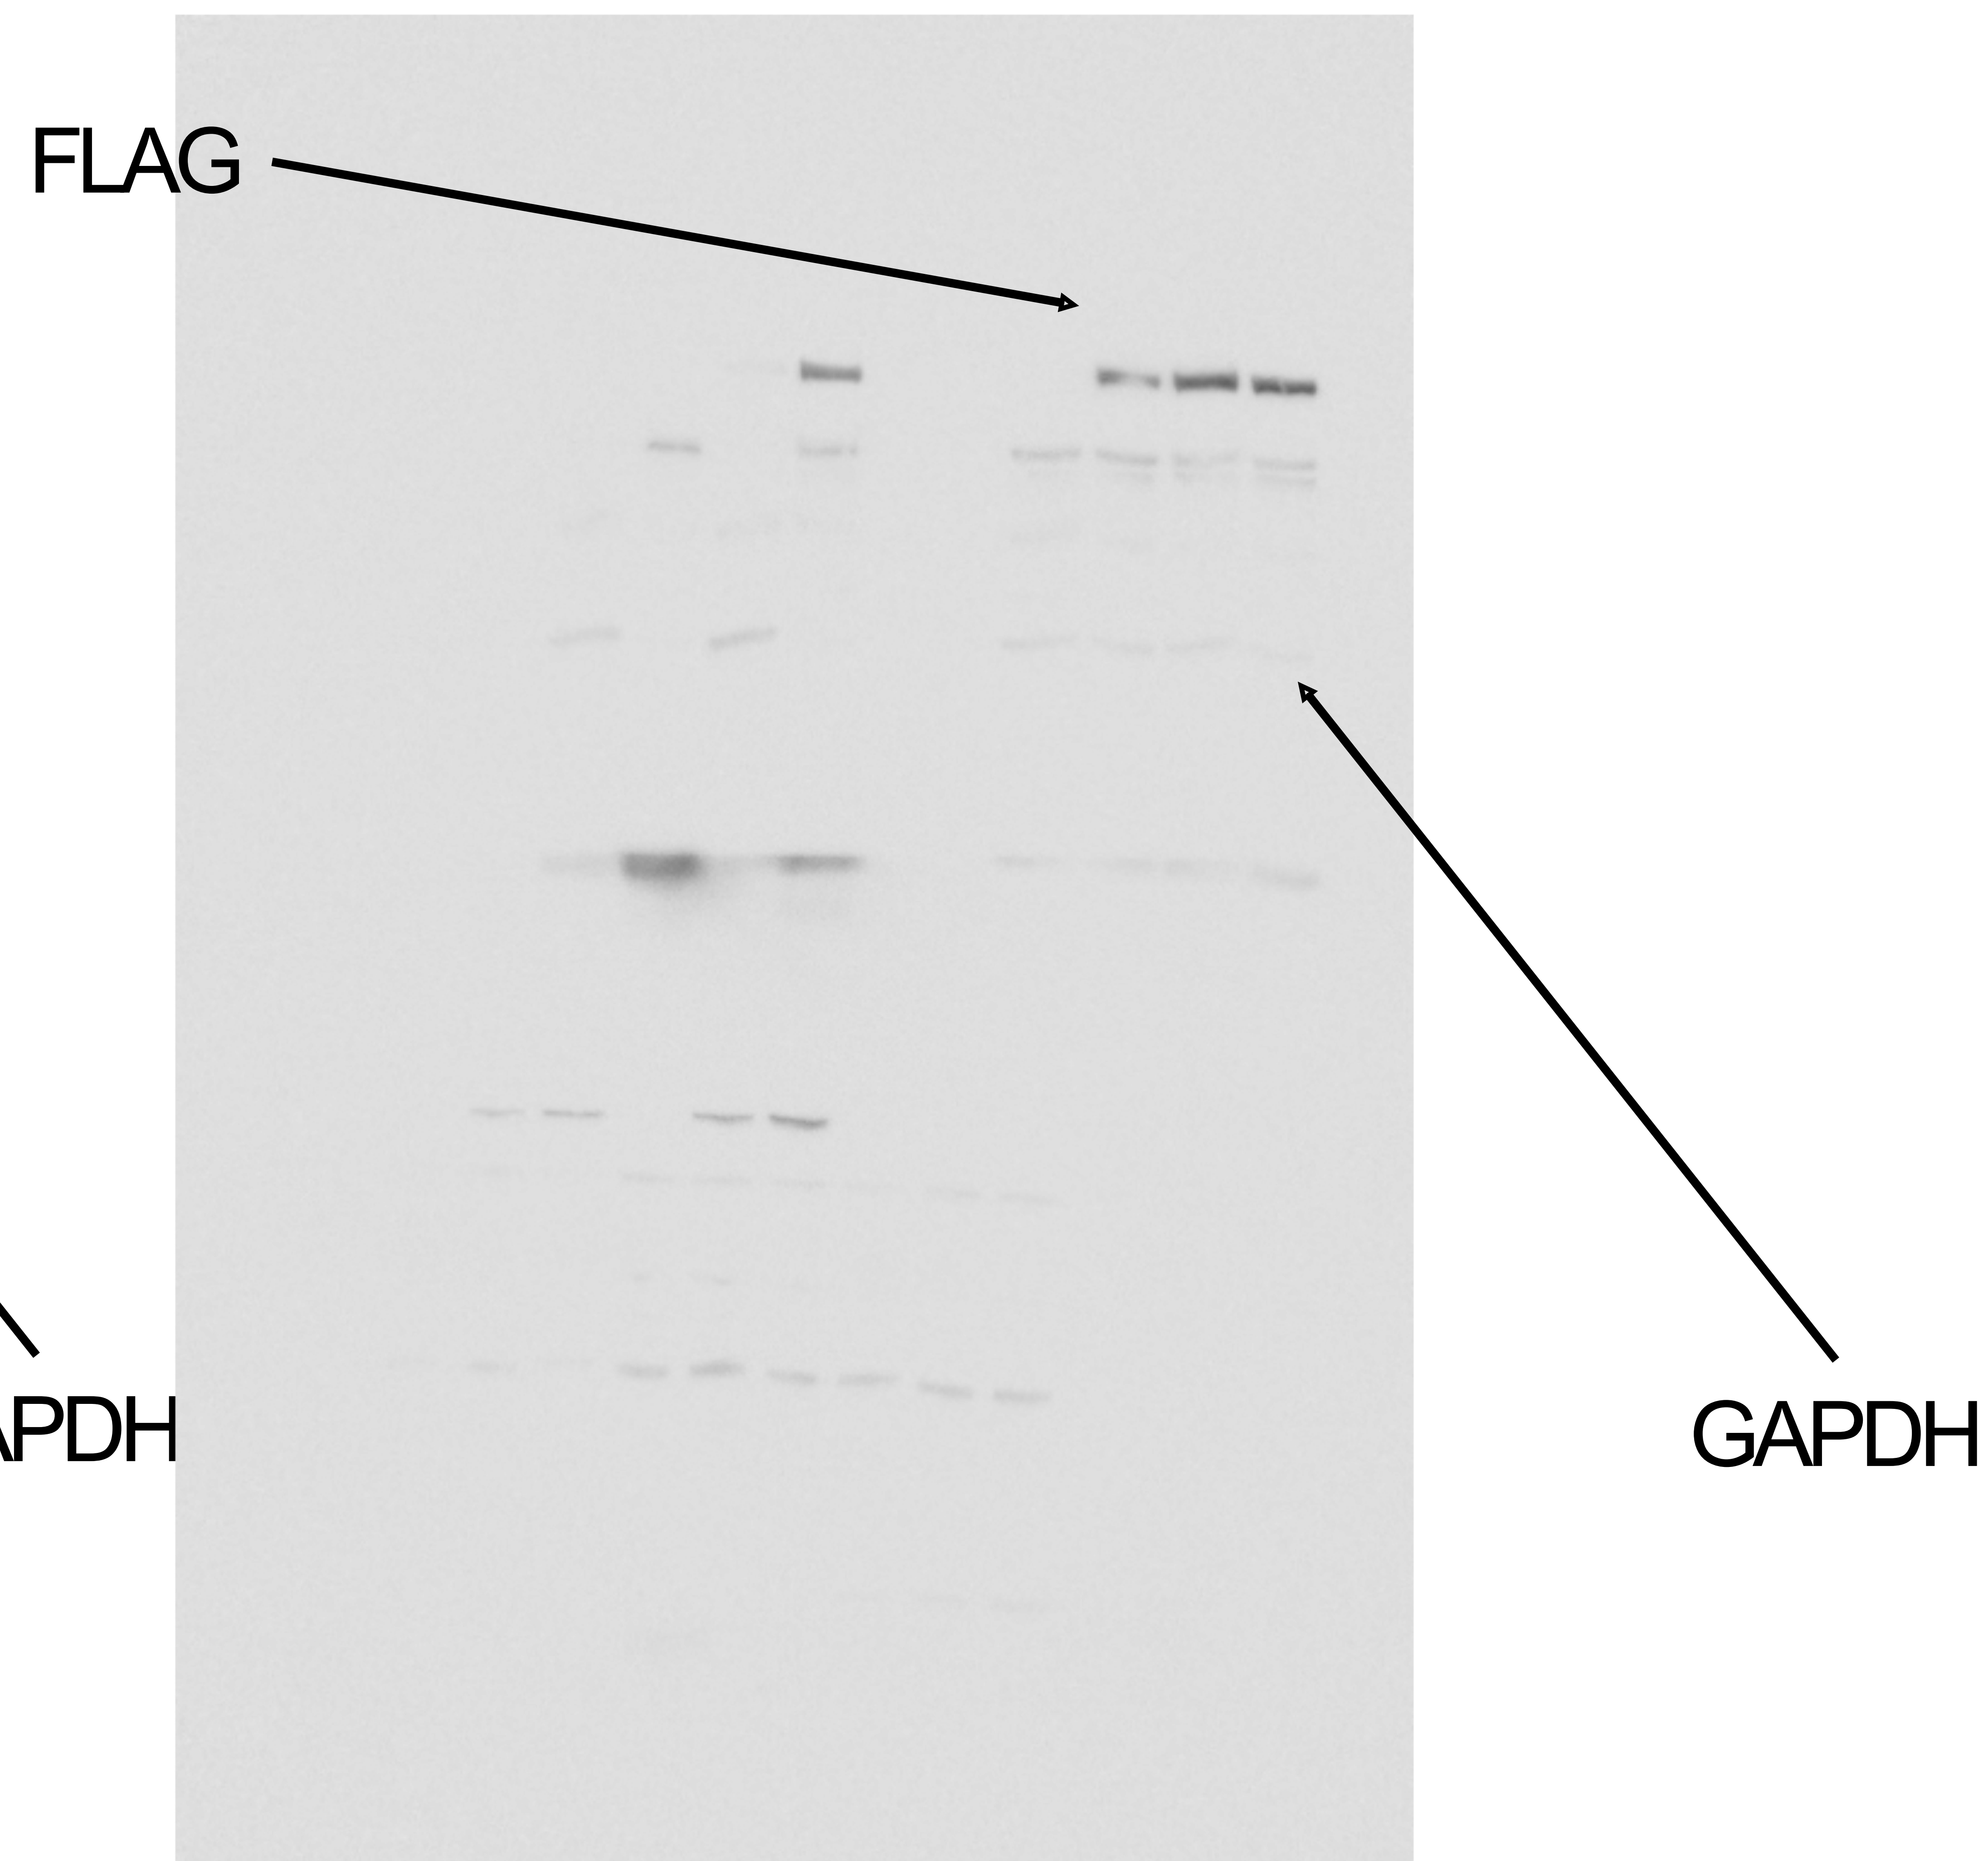

Figure 2, Source data 1. Original membranes corresponding to figure 2, panel A.

Supplement: fig2-data1 [file elife-98072-fig2-data1-v1.zip]

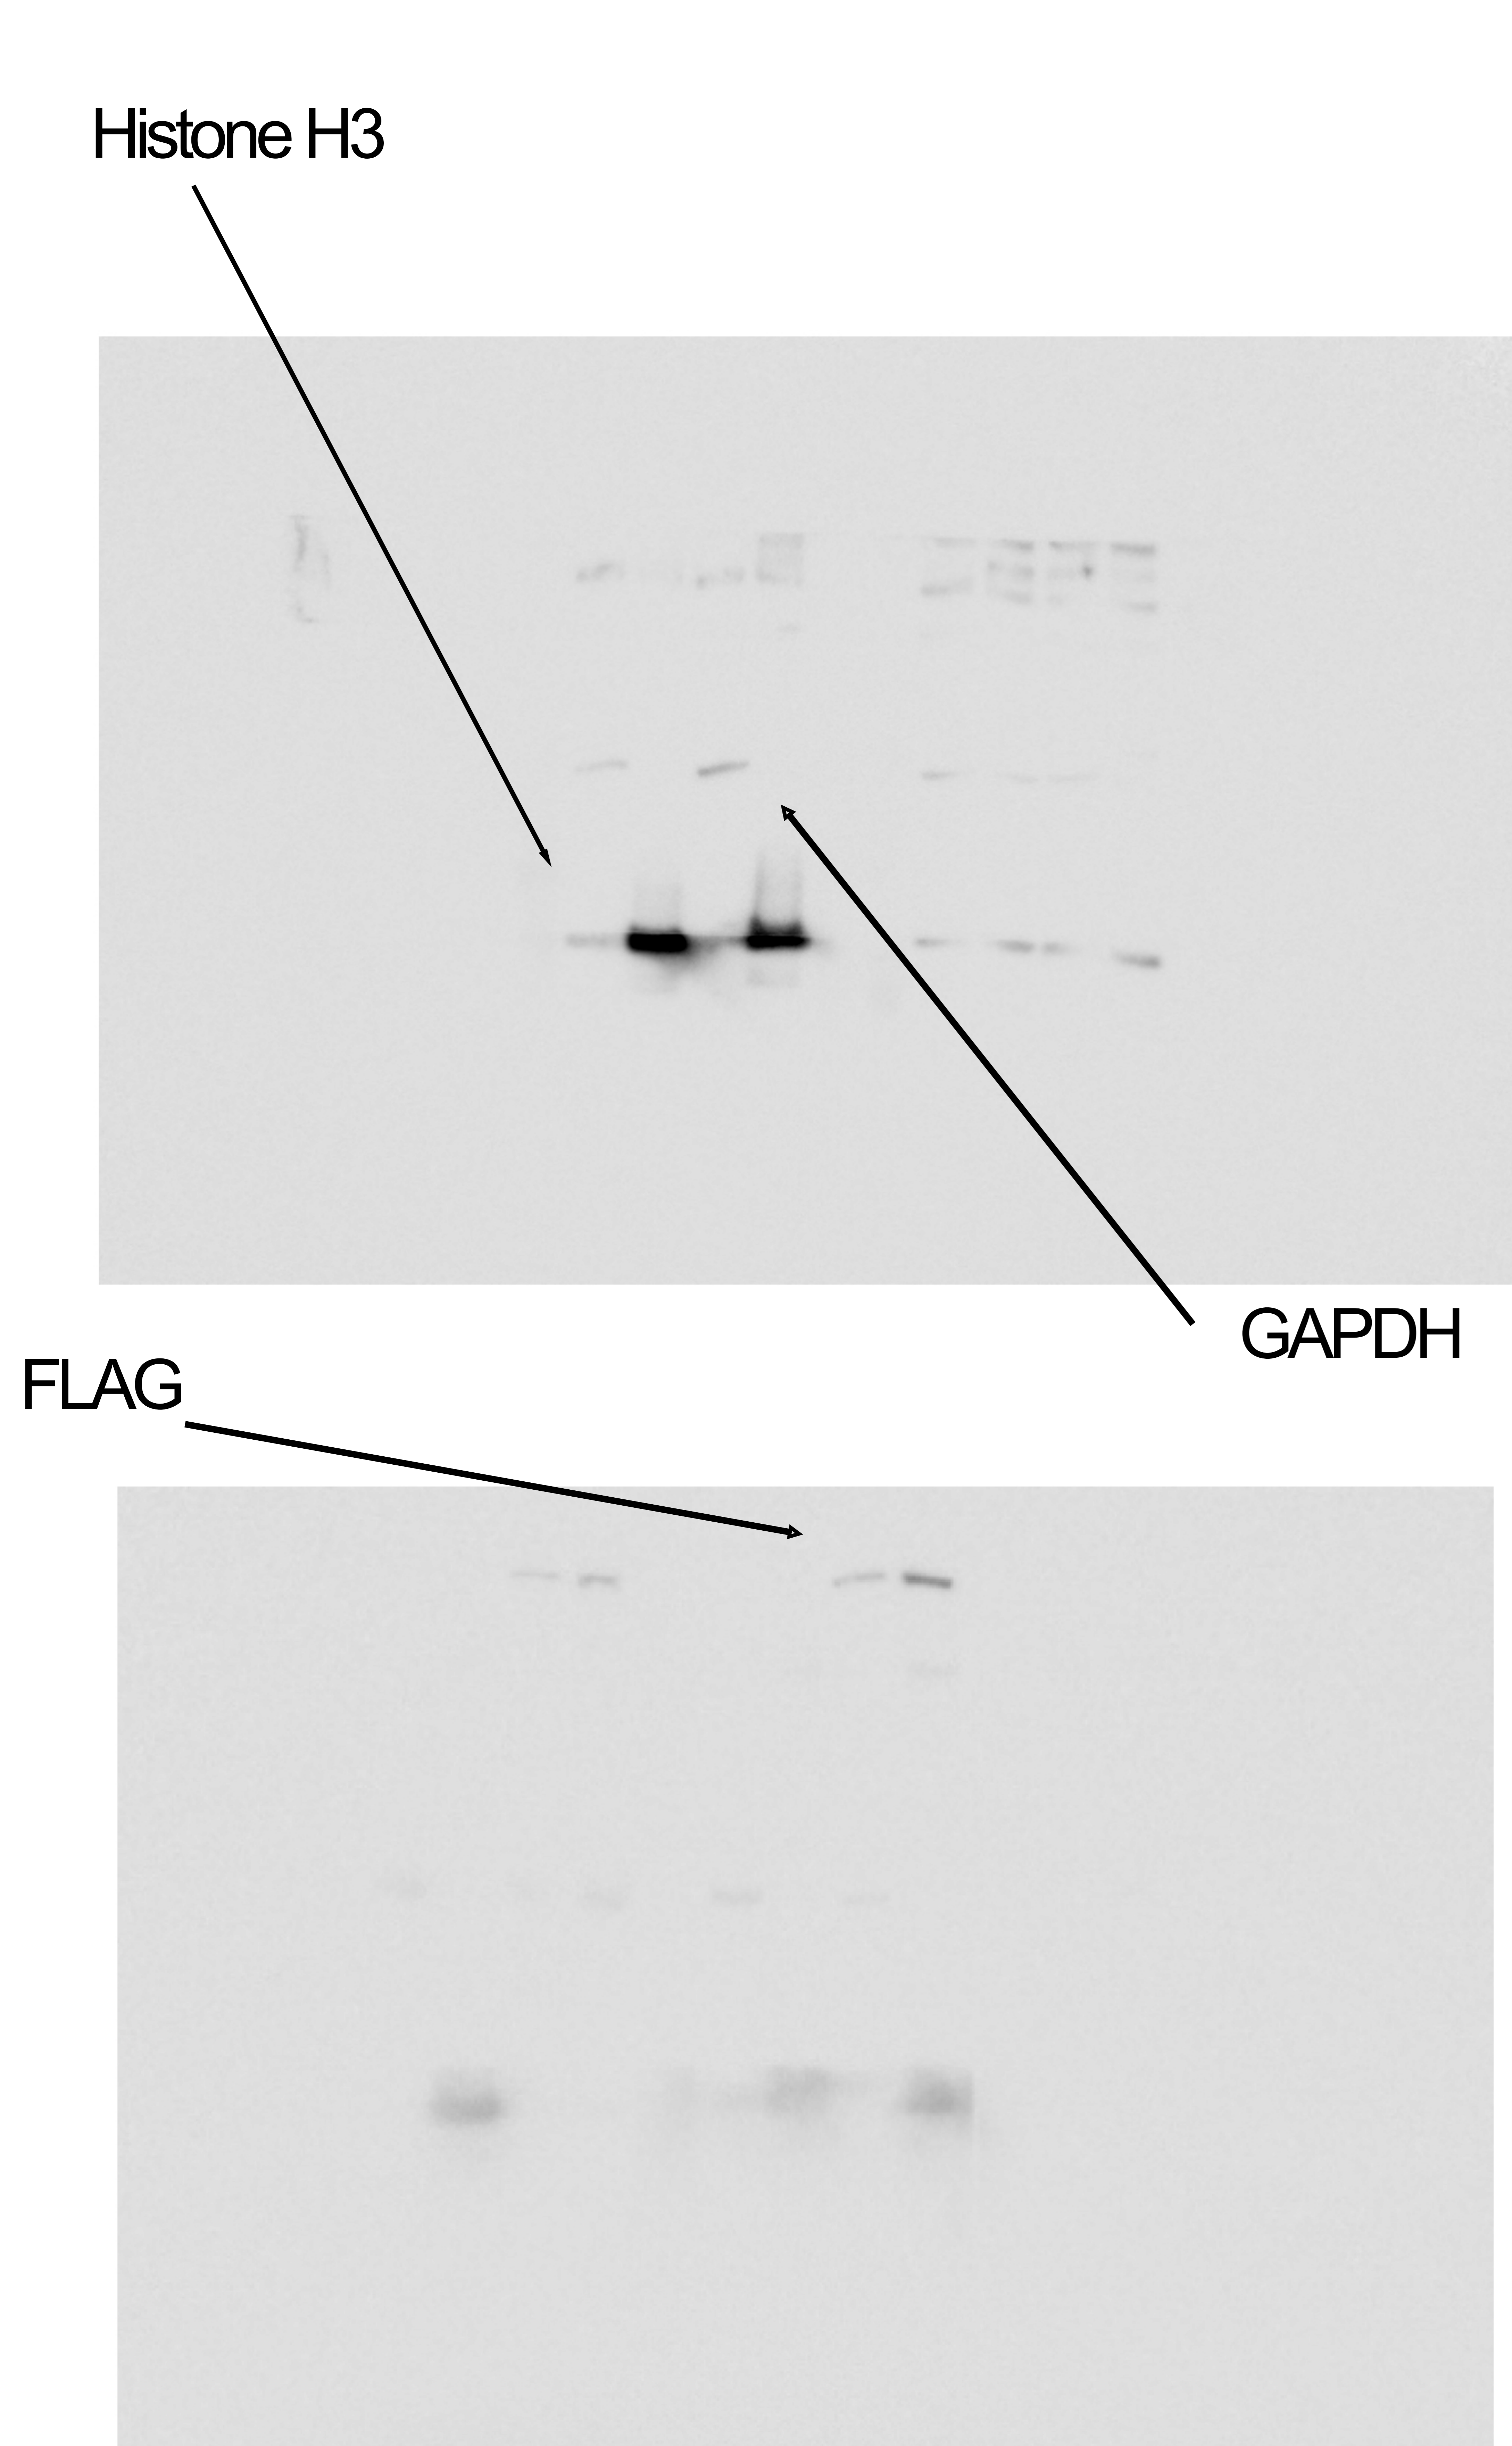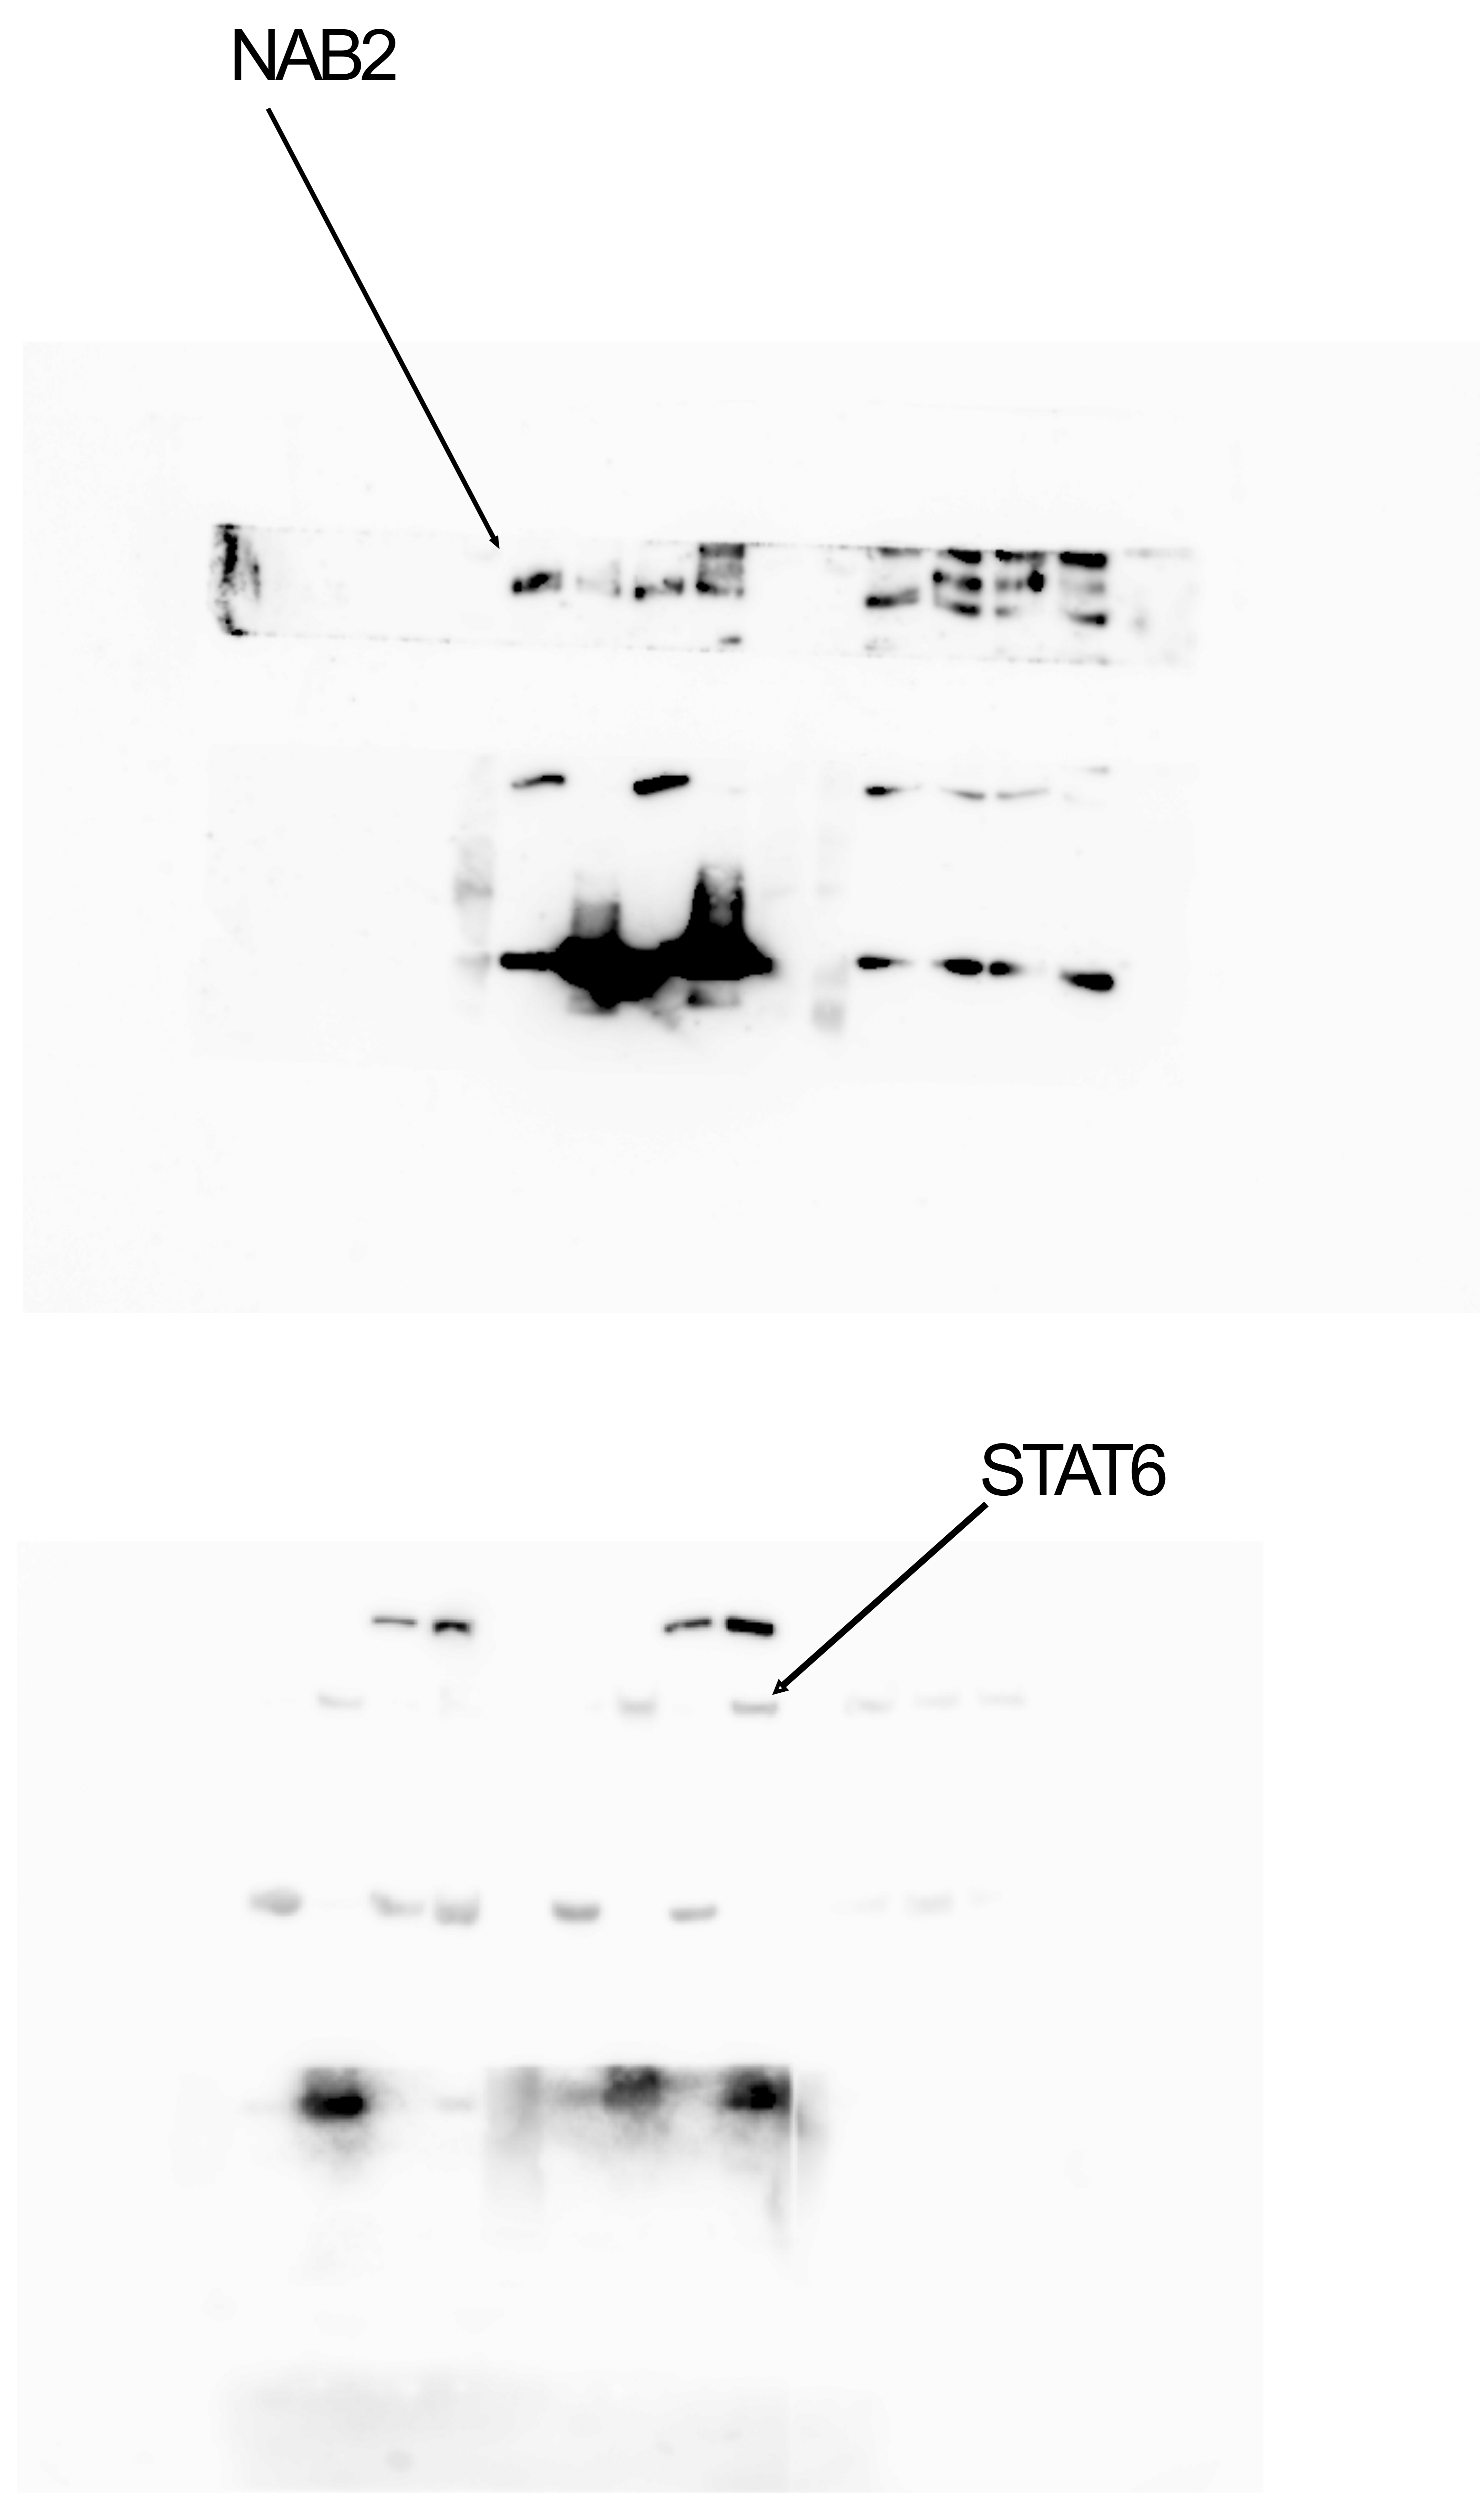

Figure 5, Source data 1. Original membranes corresponding to figure 5 , panel B.

Supplement: fig5-data1 [file elife-98072-fig5-data1-v1.zip]
